# Supplementary material for: Impact of circ-0000221 in the Pathogenesis of Hepatocellular via Modulation of miR-661–PTPN11 mRNA Axis
Source: MDPI journal article supplement (doi:10.3390/pharmaceutics14010138), 2022-01-06

# Supplementary Materials: Impact of circ-0000221 in the Pathogenesis of Hepatocellular via Modulation of miR-661–PTPN11 mRNA Axis

Marwa Matboli, Mohmed K. Hassan, Mahmoud A. Ali, Mohamed Tarek Mansour, Waheba Elsayed, Reham Atteya, Hebatallah Said Aly, Mahmoud El Meteini, Hesham Elghazaly, Sherif El-Khamisy and Sara H.A. Agwa

**Figure S1.** Print screen Shot fot hsa\_circ\_000022 predicted by Circ 2 trait : <http://gyanxet-beta.com/circdb/>, accessed on 10. November 2021.

gyanxet-beta.com/circdb/searchpval.php?pagenum=0&st=0

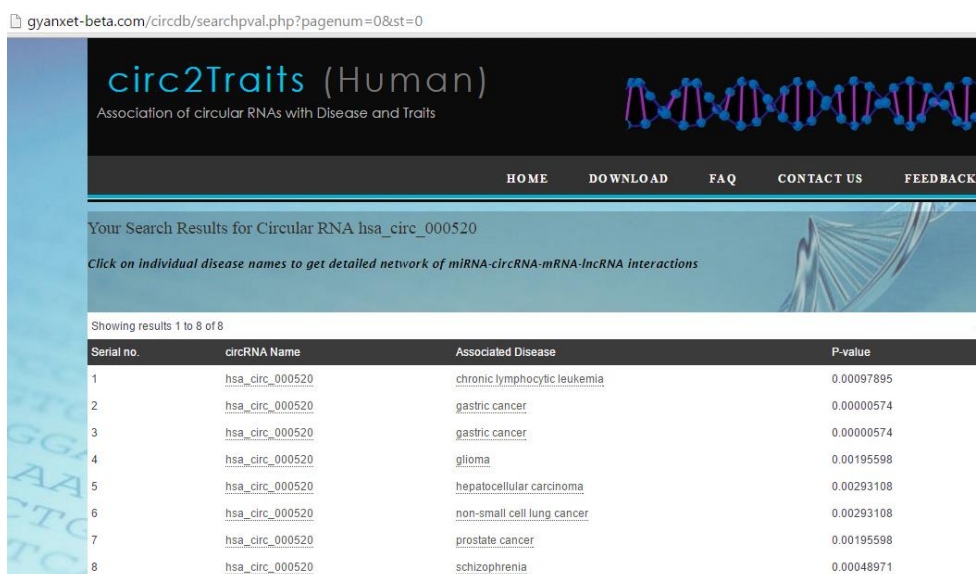

| Serial no. | circRNA Name                    | Associated Disease                           | P-value    |
|------------|---------------------------------|----------------------------------------------|------------|
| 1          | <a href="#">hsa_circ_000520</a> | <a href="#">chronic lymphocytic leukemia</a> | 0.00097895 |
| 2          | <a href="#">hsa_circ_000520</a> | <a href="#">gastric cancer</a>               | 0.00000574 |
| 3          | <a href="#">hsa_circ_000520</a> | <a href="#">gastric cancer</a>               | 0.00000574 |
| 4          | <a href="#">hsa_circ_000520</a> | <a href="#">glioma</a>                       | 0.00195598 |
| 5          | <a href="#">hsa_circ_000520</a> | <a href="#">hepatocellular carcinoma</a>     | 0.00293108 |
| 6          | <a href="#">hsa_circ_000520</a> | <a href="#">non-small cell lung cancer</a>   | 0.00293108 |
| 7          | <a href="#">hsa_circ_000520</a> | <a href="#">prostate cancer</a>              | 0.00195598 |
| 8          | <a href="#">hsa_circ_000520</a> | <a href="#">schizophrenia</a>                | 0.00048971 |

**Figure S2.** Print screen Shot fot hsa\_circ\_000022 & miR-661 predicted by Circ 2 trait : <http://gyanxet-beta.com/circdb/>, accessed on 10. November 2021.

gyanxet-beta.com/circdb/circdetails.php?name=hsa\_circ\_000520

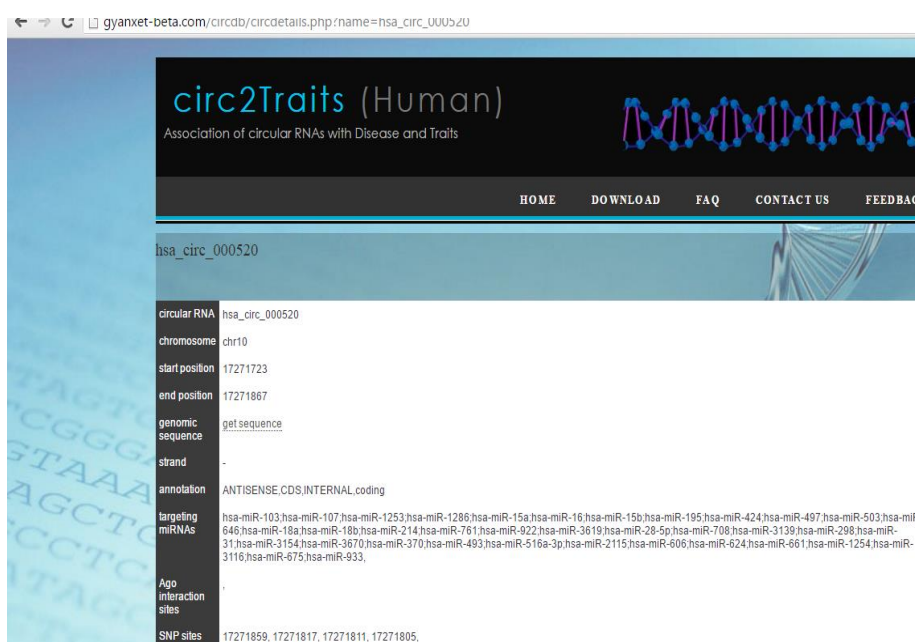

|                       |                                                                                                                                                                                                                                                                                                                                                                                                                                                               |
|-----------------------|---------------------------------------------------------------------------------------------------------------------------------------------------------------------------------------------------------------------------------------------------------------------------------------------------------------------------------------------------------------------------------------------------------------------------------------------------------------|
| circular RNA          | hsa_circ_000520                                                                                                                                                                                                                                                                                                                                                                                                                                               |
| chromosome            | chr10                                                                                                                                                                                                                                                                                                                                                                                                                                                         |
| start position        | 17271723                                                                                                                                                                                                                                                                                                                                                                                                                                                      |
| end position          | 17271867                                                                                                                                                                                                                                                                                                                                                                                                                                                      |
| genomic sequence      | <a href="#">get sequence</a>                                                                                                                                                                                                                                                                                                                                                                                                                                  |
| strand                | -                                                                                                                                                                                                                                                                                                                                                                                                                                                             |
| annotation            | ANTISENSE,CDS,INTERNAL coding                                                                                                                                                                                                                                                                                                                                                                                                                                 |
| targeting miRNAs      | hsa-miR-103,hsa-miR-107,hsa-miR-1253,hsa-miR-1286,hsa-miR-15a,hsa-miR-16,hsa-miR-15b,hsa-miR-195,hsa-miR-424,hsa-miR-497,hsa-miR-503,hsa-miR-646,hsa-miR-18a,hsa-miR-18b,hsa-miR-214,hsa-miR-761,hsa-miR-922,hsa-miR-3619,hsa-miR-28-5p,hsa-miR-708,hsa-miR-3139,hsa-miR-298,hsa-miR-31,hsa-miR-3154,hsa-miR-3670,hsa-miR-370,hsa-miR-493,hsa-miR-516a-3p,hsa-miR-2115,hsa-miR-606,hsa-miR-624,hsa-miR-661,hsa-miR-1254,hsa-miR-3116,hsa-miR-675,hsa-miR-933, |
| Ago interaction sites | -                                                                                                                                                                                                                                                                                                                                                                                                                                                             |
| SNP sites             | 17271859, 17271817, 17271811, 17271805,                                                                                                                                                                                                                                                                                                                                                                                                                       |

**Figure S3.** Print screen Shot for miR-661 & PTPN-11 predicted by Target scan; Available at [http://amp.pharm.mssm.edu/Harmonizome/gene\\_set/hsa-miR-661/TargetScan+Predicted+Conserved+microRNA+Targets](http://amp.pharm.mssm.edu/Harmonizome/gene_set/hsa-miR-661/TargetScan+Predicted+Conserved+microRNA+Targets) accessed on 10. November 2021.

|                                                                                                           |                                                        |         |
|-----------------------------------------------------------------------------------------------------------|--------------------------------------------------------|---------|
| ← → ↺ amp.pharm.mssm.edu/Harmonizome/gene_set/hsa-miR-661/TargetScan+Predicted+Conserved+microRNA+Targets |                                                        |         |
| FAM214B                                                                                                   | family with sequence similarity 214, member B          | 1.45615 |
| PTPN3                                                                                                     | protein tyrosine phosphatase, non-receptor type 3      | 1.45615 |
| STYX                                                                                                      | serine/threonine/tyrosine interacting protein          | 1.45615 |
| NAA25                                                                                                     | N(alpha)-acetyltransferase 25, NatB auxiliary subunit  | 1.45615 |
| GALE                                                                                                      | UDP-galactose-4-epimerase                              | 1.45615 |
| PAXBP1                                                                                                    | PAX3 and PAX7 binding protein 1                        | 1.45615 |
| PCK2                                                                                                      | phosphoenolpyruvate carboxykinase 2 (mitochondrial)    | 1.45615 |
| NHP2                                                                                                      | NHP2 ribonucleoprotein                                 | 1.45615 |
| GJC1                                                                                                      | gap junction protein, gamma 1, 45kDa                   | 1.45615 |
| FUZ                                                                                                       | fuzzy planar cell polarity protein                     | 1.45615 |
| KCTD15                                                                                                    | potassium channel tetramerization domain containing 15 | 1.26663 |
| DTX1                                                                                                      | deltex 1, E3 ubiquitin ligase                          | 1.26663 |
| MAP3K3                                                                                                    | mitogen-activated protein kinase kinase kinase 3       | 1.26663 |
| SIM2                                                                                                      | single-minded family bHLH transcription factor 2       | 1.26663 |
| EPHB2                                                                                                     | EPH receptor B2                                        | 1.26663 |
| CHRM1                                                                                                     | cholinergic receptor, muscarinic 1                     | 1.26663 |
| PRPF38A                                                                                                   | pre-mRNA processing factor 38A                         | 1.26663 |
| ECE1                                                                                                      | endothelin converting enzyme 1                         | 1.26663 |
| CALCOCO2                                                                                                  | calcium binding and coiled-coil domain 2               | 1.26663 |

Showing 1 to 20 of 314 entries

Previous

**Figure S4.** Exogenous expression of hsa\_circ\_000022 significantly reduced the colony-forming ability of the SNU449 and HepG2 cells.

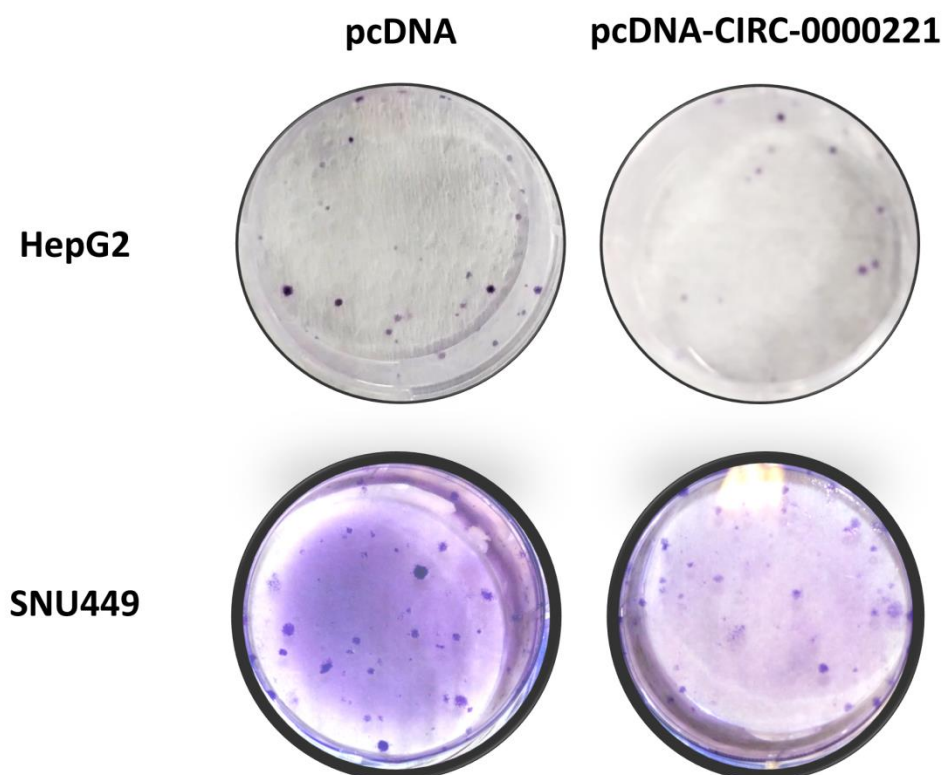

Supplement: s1 [file s1]
